# Supplementary material for: Hydrodynamics of the Vadose Zone of a Layered Soil Column
Source: MDPI journal article supplement (doi:10.3390/w15020221), 2023-01-04
Supplement: s1 [file s1]

The calibration curves of the pressure transducers along with their linear equations are presented below. The factors of the equations were inserted into the device's software in order to convert voltage (mV) to soil pore's tension (cm).

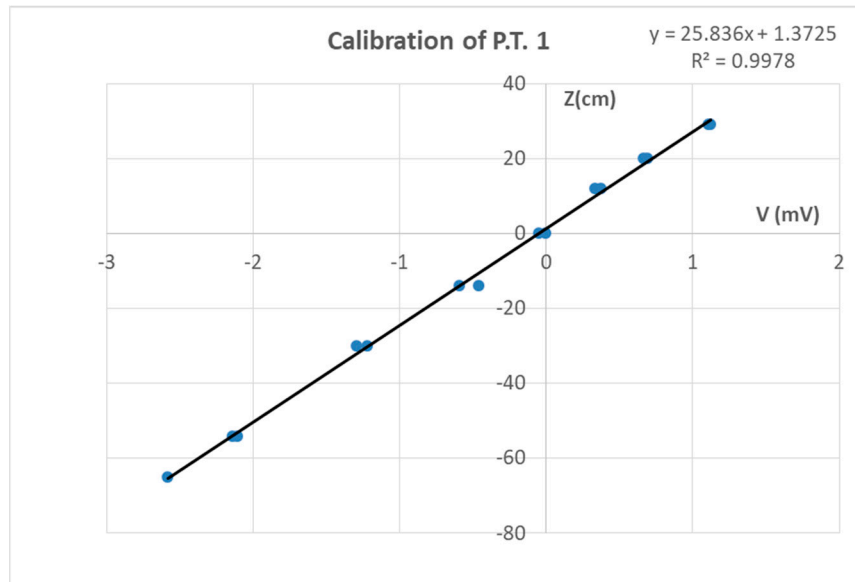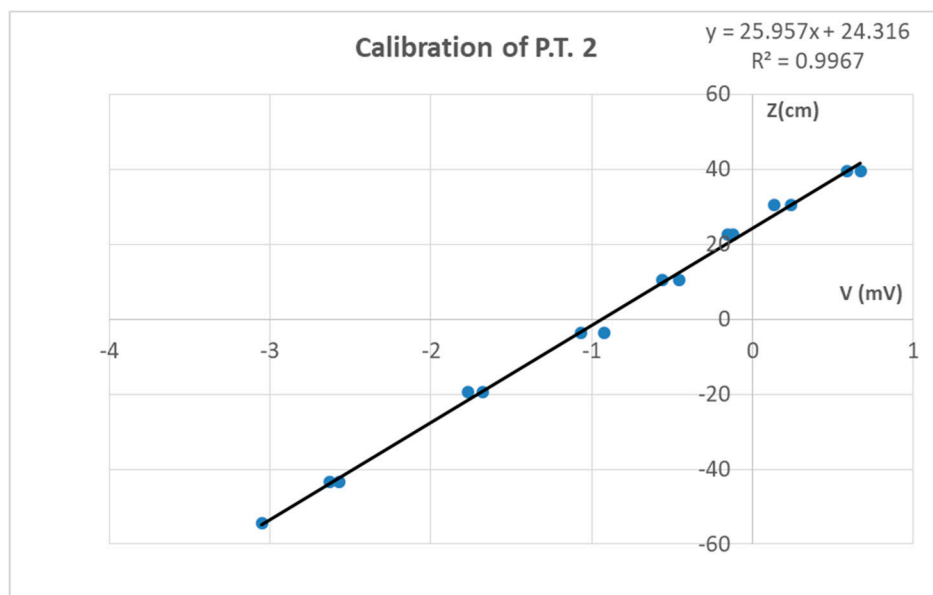

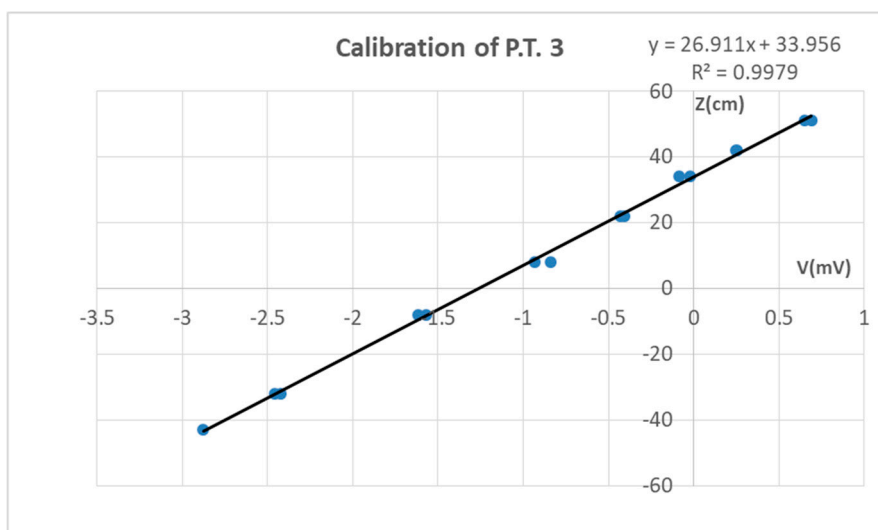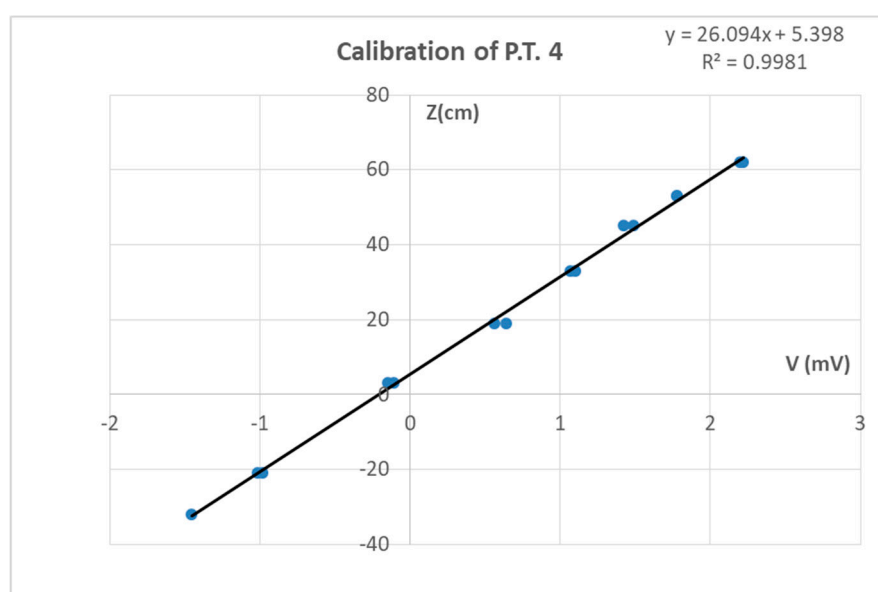

**Figure S1.** Calibration curves of the CC-PT system.
